# Supplementary material for: The Effect of Plastic-Related Compounds on Transcriptome-Wide Gene Expression on CYP2C19-Overexpressing HepG2 Cells
Source: MDPI journal article supplement (doi:10.3390/molecules28165952), 2023-08-08
Supplement: s1 [file s1]

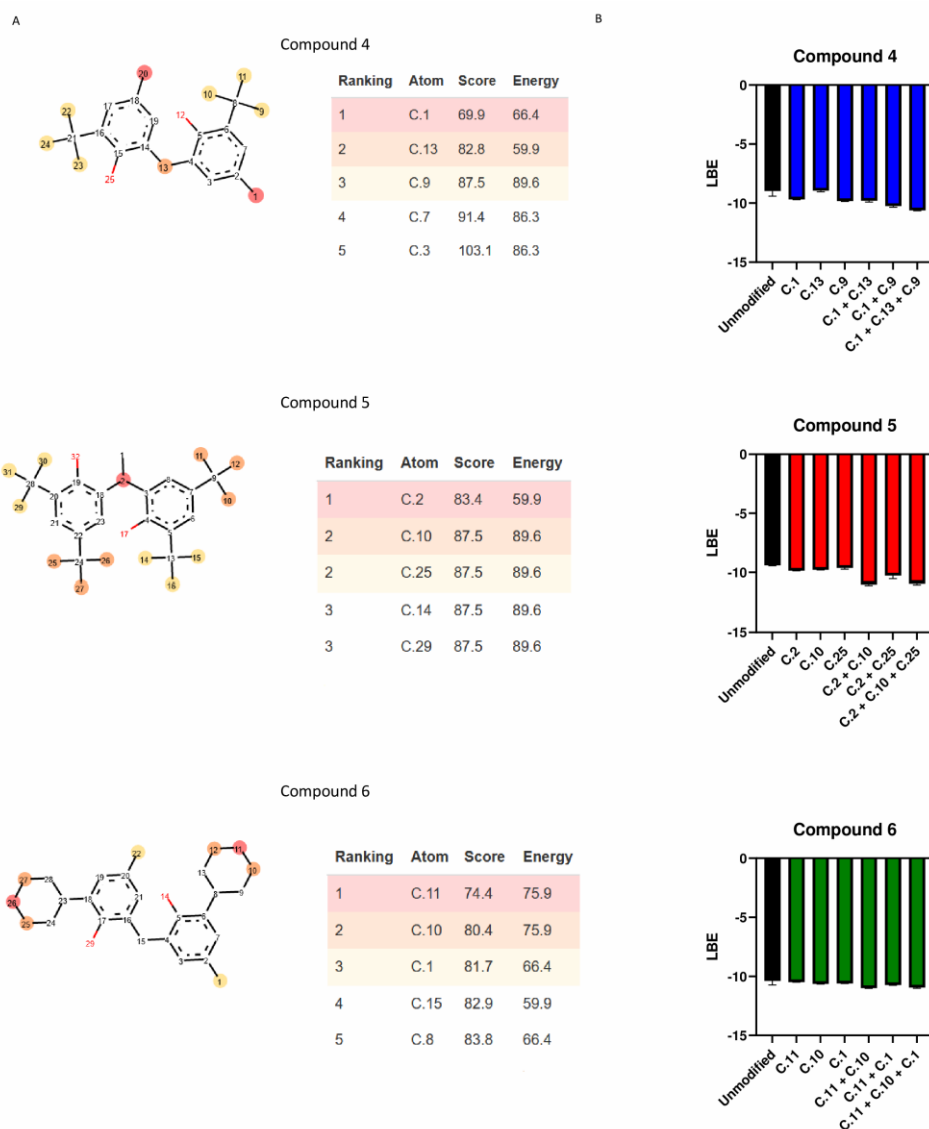

**Supplementary Figure S1.** Predicted sites of metabolism and lowest binding energy (LBE) for the selected compounds. (A) Possible sites of hydroxylation by CYP2C19 for the three selected compounds with the top 5 ranking positions. (B) Lowest binding energies (LBE) of the metabolites of the various compounds in different combinations in comparison with the unmodified molecule.
